# Supplementary material
Source: publisher figshare collection journal article supplement (https://aacr.figshare.com/articles/dataset/_/23553165)
Supplement: Supplementary file 1 [file 41323674]

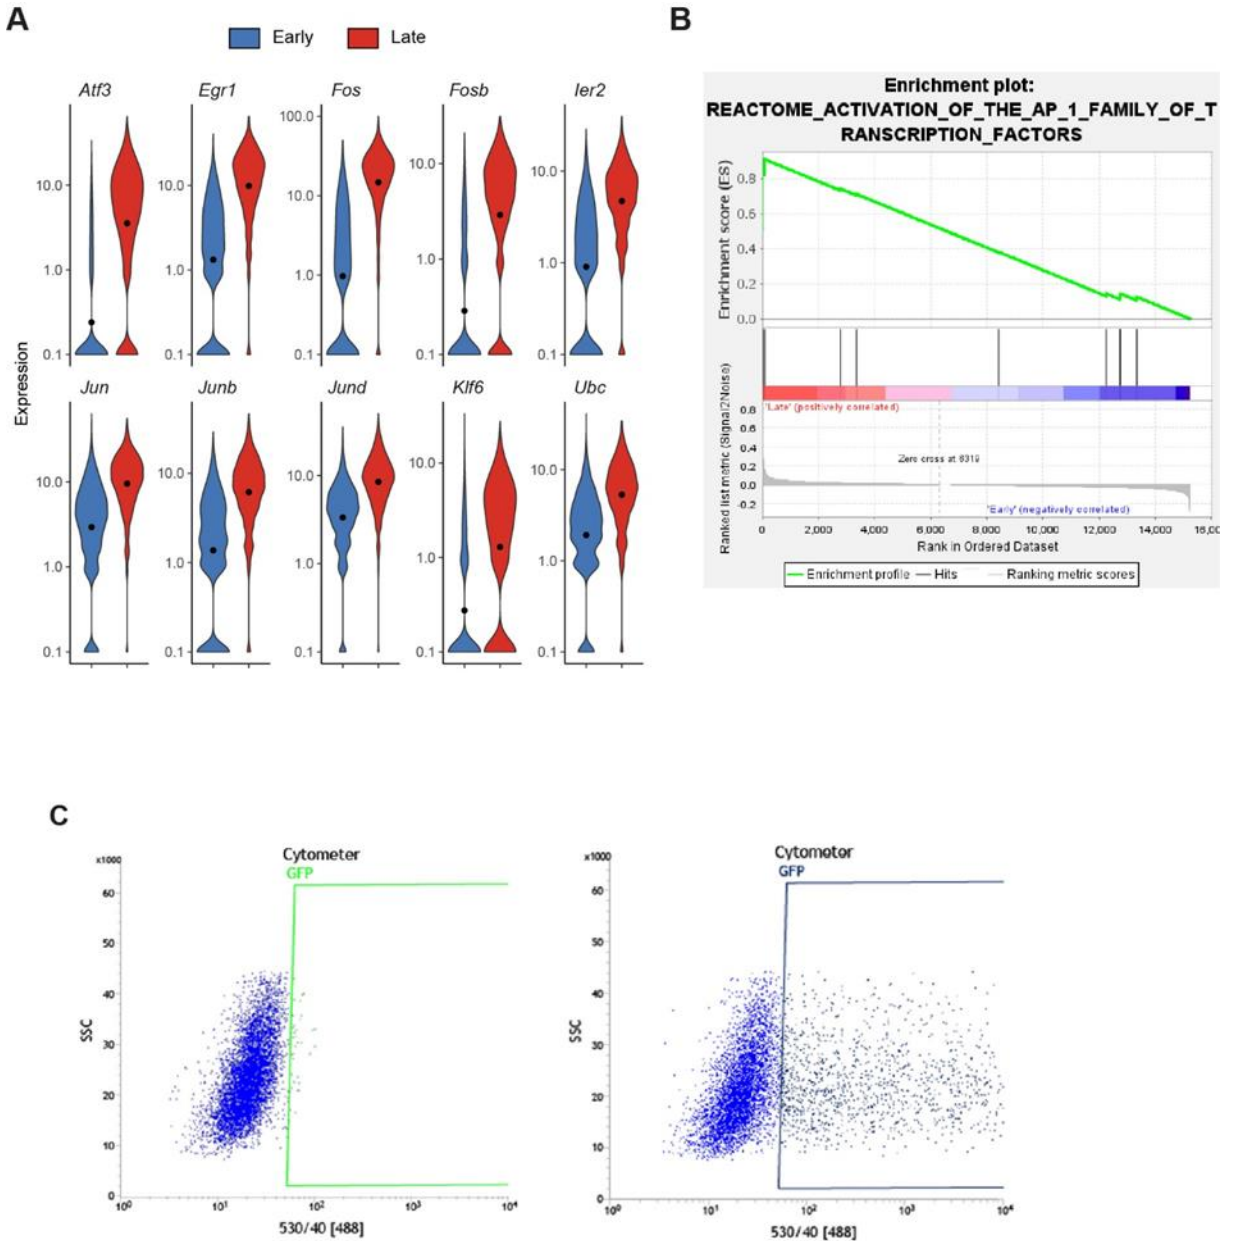

**Supplementary Figure S6 | Expression and validation of AP-1 family genes in late tumor development.** **A**, Violin plots of genes listed in Figure 2A. **B**, GSEA enrichment plot for “Reactome activation of the AP-1 family of transcription factors” geneset. **C**, Representative FACS plot for GFP-enriched cells after transduction of JunDN vector (right) or mock transduced cells (left). Plots shown are after single cell discrimination and live cell sorting by 7-AAD.
